# Supplementary material
Source: Springer Nature journal article supplement (https://www.springermedizin.de/resource/supplementary/13075_2010_9712_MOESM1_ESM.pdf/9693340)
Supplement: MOESM1 [file 9693340]

# Randomized ( $n = 67$ )

## Allocated to Nordic Walking group ( $n = 34$ )

*Received allocated intervention ( $n = 29$ )*

*Discontinued intervention ( $n = 5$ )*

## Allocated to Low-Intensive Walking group ( $n = 33$ )

*Received allocated intervention ( $n = 28$ )*

*Discontinued intervention ( $n = 5$ )*

## Lost to follow up at post treatment examination ( $n = 5$ )

*Change of work schedule ( $n = 2$ )*

*Concomitant disorders ( $n = 1$ )*

*Increased pain ( $n = 1$ )*

*Not interested ( $n = 1$ )*

## Lost to follow up at post treatment examination ( $n = 4$ )

*Not interested ( $n=4$ )*

## Analysed at post treatment examination ( $n = 29$ )

*Excluded from analysis ( $n = 0$ )*

## Analysed post treatment examination ( $n = 29$ )

*Excluded from analysis ( $n = 0$ )*

## Lost to follow up at long time follow up examination ( $n = 6$ )

*Change of work schedule ( $n = 2$ )*

*Increased pain ( $n = 1$ )*

*Not interested ( $n = 1$ )*

*Concomitant disorders ( $n = 1$ )*

*Unknown reason ( $n = 1$ )*

## Lost to follow up at long time follow up examination ( $n = 7$ )

*Not interested ( $n = 5$ )*

*Concomitant disorders ( $n = 2$ )*

## Analysed at long time follow up examination ( $n = 28$ )

*Excluded from analysis ( $n = 0$ )*

## Analysed at long time follow up examination ( $n = 26$ )

*Excluded from analysis ( $n = 0$ )*
